# Supplementary material for: Downregulation of semaphorin 3E promotes hallmarks of experimental chronic allergic asthma
Source: PubMed Central journal article supplement (PMC5716780; doi:10.18632/oncotarget.22144), 2017-10-27
Supplement: oncotarget-08-98953-s001.pdf [file oncotarget-08-98953-s001.pdf]

## Downregulation of semaphorin 3E promotes hallmarks of experimental chronic allergic asthma

### SUPPLEMENTARY MATERIALS

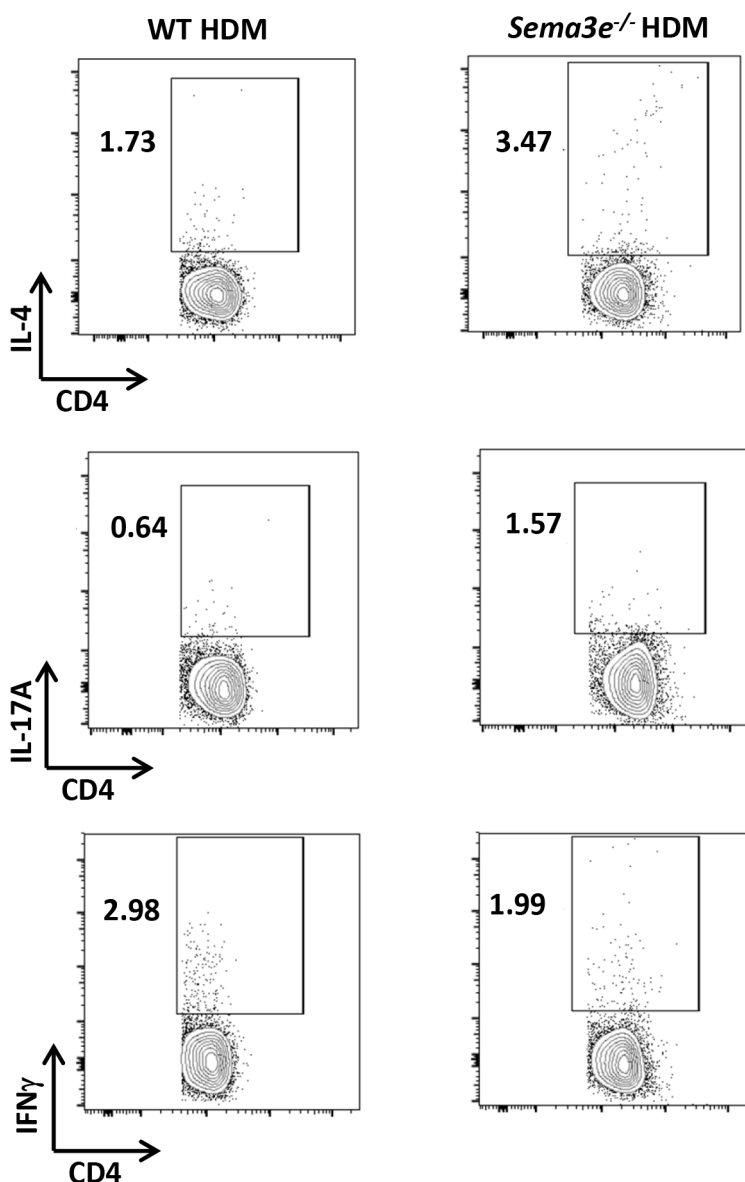

**Supplementary Figure 1: *Sema3E* deficiency leads to Th2/Th17-skewed cytokine response upon HDM challenge in mice.** Intracellular production of IL-4, IL-17A, and IFN- $\gamma$  was investigated in CD4<sup>+</sup> MLN cells obtained from *Sema3e*<sup>-/-</sup> or WT mice after chronic exposure to HDM by flow cytometry using specific antibodies *ex vivo* (n = 5-6 mice per group).

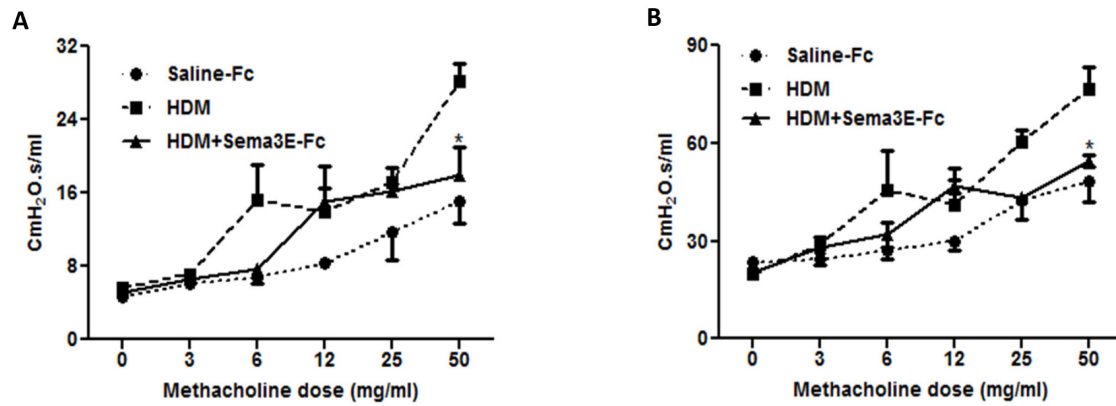

**Supplementary Figure 2: Sema3E treatment prevents HDM-induced pulmonary resistance and elastance.** Protective effect of intranasal Sema3E administration on lung tissue resistance (A) and elastance (B) was evaluated in chronically HDM-challenged mice by a FlexiVent system. (n=4 mice per group, \* $P < 0.05$ ).

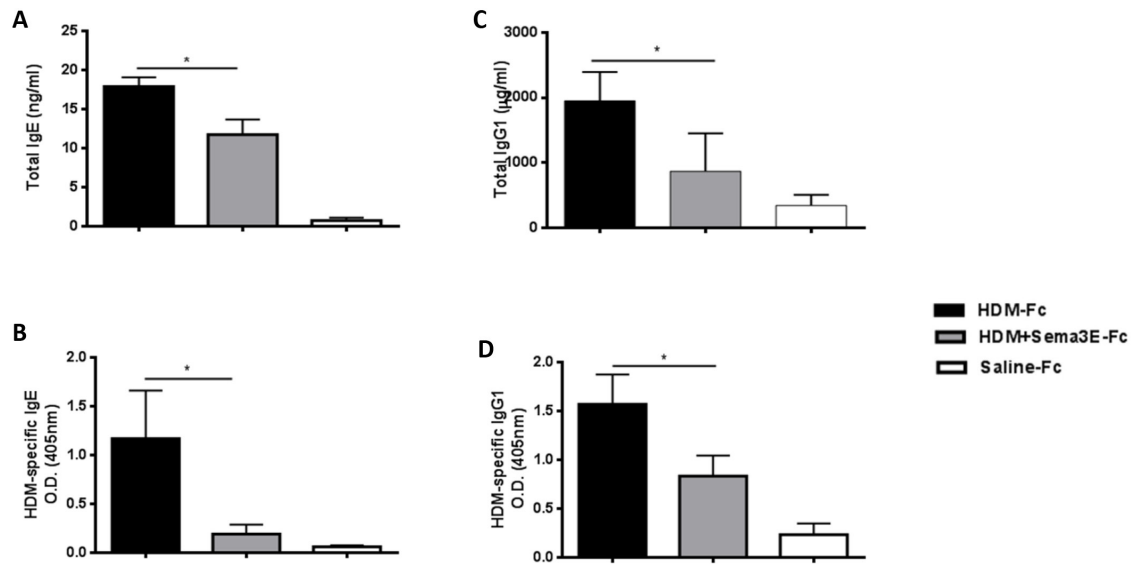

**Supplementary Figure 3: Sema3E treatment negatively regulates HDM-induced IgE and IgG1 synthesis.** Total (A) and HDM-specific IgE (B) as well as IgG1 (C-D) were measured in the serum samples obtained from the mice treated with Sema3E before HDM challenge by ELISA (n=4 mice per group,  $*P < 0.05$ ).

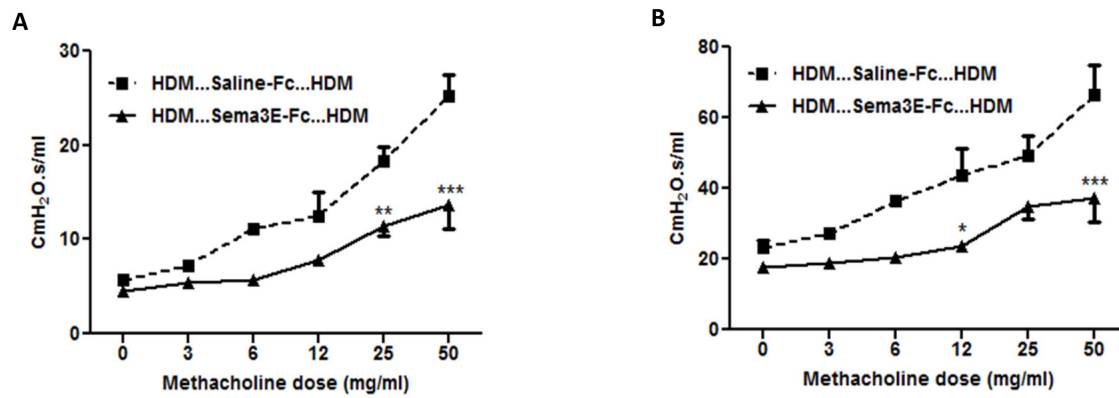

**Supplementary Figure 4: Sema3E-mediated reduction of pulmonary resistance and elastance sustains upon HDM re-exposure.** The effect of intranasal treatment with Sema3E on lung tissue resistance (A) and elastance (B) was evaluated using a FlexiVent system in an established chronic model after HDM re-exposure. (n=4 mice per group, \* $P < 0.05$ , \*\* $P < 0.01$ , and \*\*\* $P < 0.001$ ).

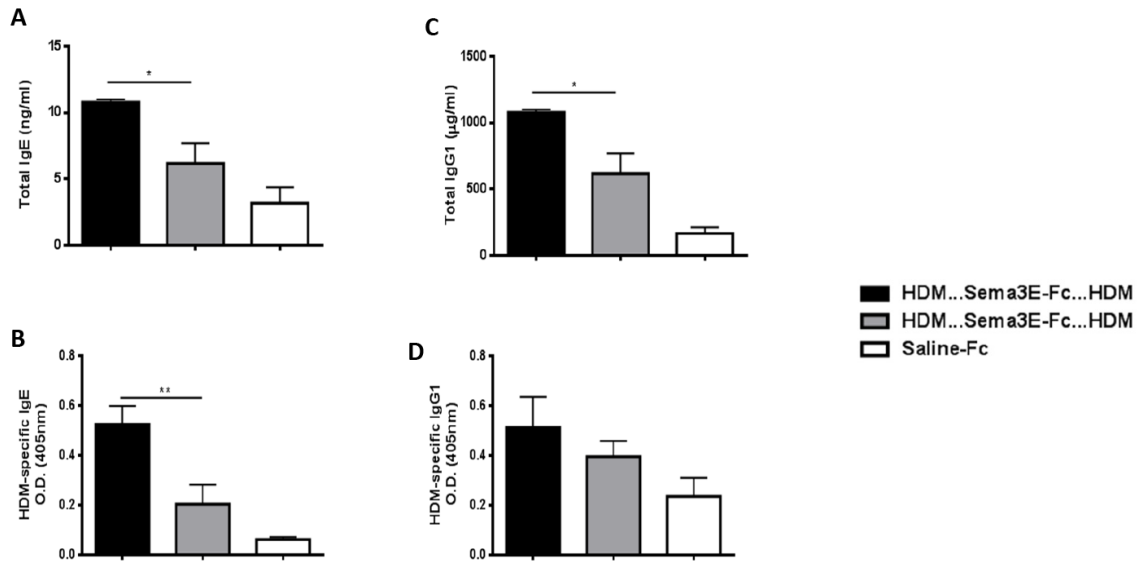

**Supplementary Figure 5: Sema3E treatment reduces IgE and IgG1 synthesis after HDM re-exposure.** Total (A) and HDM-specific IgE (B) as well as IgG1 (C-D) in the serum samples obtained from the chronically challenged mice treated with either Sema3E or saline was measured by ELISA upon HDM re-exposure (n=4 mice per group, \* $P < 0.05$  and \*\* $P < 0.01$ ).
